# Supplementary material for: Empowering a Methanol-Dependent Escherichia coli via Adaptive Evolution Using a High-Throughput Microbial Microdroplet Culture System
Source: Front Bioeng Biotechnol. 2020 Jul 9;8:570. doi: 10.3389/fbioe.2020.00570 (PMC7363950; doi:10.3389/fbioe.2020.00570)
Supplement: Supplementary file 1 [file Data_Sheet_1.xlsx]

## Sheet: Sheet1
	lacI	iprA	citD	ECSE_1957	nupC	rsmE	FadH2	pckA	gntR	coaA	rplL	yjbT|yjbH	nadR	frmA	yneE	yojH|yojI	hyfA	recN	C4J69_20285	nfuA	rffG	sdhA	gntU	hfq	idnT	thiK	edd	yojH	mqo
MeSV2.2-1
MeSV2.2-1 R1	ns		s		s	st			ns&ns				ns	fd		fd			fd	nfd
MeSV2.2-1 R2	ns		s		s				ns&ns	ns		s	ns	fd				fi&nfi		nfd
MeSV2.2-1 R3	ns		s		s	st			ns&ns	ns		s	ns	fd						nfd
MeSV2.2-2
MeSV2.2-2 R1	ns		s		s			ns	ns&ns	ns		s	ns	fd						nfd
MeSV2.2-2 R2	ns		s		s				ns&ns	ns		s	ns	fd				fd&fi&nfi		nfd
MeSV2.2-2 R3	ns	ns	s	ns	s		s	ns	ns&ns	ns	s	s	ns	fd	fi		st			nfd	fd
MeSV2.2-3
MeSV2.2-3 R1	ns		s		s			ns	ns&ns	ns		s	ns	fd						nfd		ns	ns	ns	nfi&nfi	fd		fi
MeSV2.2-3 R2	ns&ns		s		s			ns	ns&ns	ns		s	ns	fd						nfd		ns	ns	ns		fd	fi	fi	nfi
MeSV2.2-3 R3	ns		s		s			ns	ns&ns				ns	fd						nfd		ns	ns	ns	ns	fd	fi
ns:nonsynonymous SVV
s:synonymous SVV
st:stopgain
fd:frameshift deletion
nfd:nonframeshift deletion
fi:frameshift insertion
nfi:frameshift insertion
ns&ns:Two genetic mutations occurred and the mutation type was ns and ns
Gene	Protein
lacI	LacI family DNA-binding transcriptional regulator
iprA	hydrogen peroxide resistance inhibitor IprA
citD	citrate lyase acyl carrier protein
ECSE_1957	GGDEF domain-containing protein
nupC	nucleoside permease NupC
rsmE	16S rRNA (uracil(1498)-N(3))-methyltransferase
FadH2	NADPH-dependent 2,4-dienoyl-CoA reductase
pckA	phosphoenolpyruvate carboxykinase (ATP)
gntR	HTH-type transcriptional regulator GntR
coaA	type I pantothenate kinase
rplL	50S ribosomal protein L7/L12
yjbT|yjbH	YjbH domain-containing protein;MULTISPECIES: periplasmic protein
nadR	multifunctional transcriptional regulator/nicotinamide-nucleotide adenylyltransferase/ribosylnicotinamide kinase NadR
frmA	S-(hydroxymethyl)glutathione dehydrogenase
yneE	bestrophin family inner membrane protein
yojH|yojI	malate dehydrogenase (quinone)
hyfA	hydrogenase 4 subunit HyfA
recN	DNA repair protein RecN
C4J69_20285	hypothetical protein
nfuA	Fe-S biogenesis protein NfuA
rffG	dTDP-glucose 4,6-dehydratase
sdhA	succinate dehydrogenase flavoprotein subunit
gntU	gluconate transporter
hfq	RNA chaperone Hfq
idnT	gnt-II system L-idonate transporter
thiK	thiamine kinase
edd	phosphogluconate dehydratase
yojH	microcin J25 efflux ABC transporter YojI
mqo	Malate quinone oxidoreductase
